# Supplementary material for: A Rare Case of Brachyolmia with Amelogenesis Imperfecta Caused by a New Pathogenic Splicing Variant in LTBP3
Source: MDPI journal article supplement (doi:10.3390/genes12091406), 2021-09-12
Supplement: s1 [file s1]

**Supplementary Table S1.** WES data output.

|                                                                                | Data            |
|--------------------------------------------------------------------------------|-----------------|
| Target regions coverage, 2x <sup>1</sup>                                       | 98.0%           |
| Target regions coverage, 10x <sup>1</sup>                                      | 96.5%           |
| Target regions coverage, 20x <sup>1</sup>                                      | 94.6%           |
| Average sequencing depth on target <sup>1</sup>                                | 86x             |
| Number of variants with predicted functional effect                            | 12,416          |
| Novel, clinically associated, and unknown/low frequency variants <sup>2</sup>  | 534             |
| Putative disease genes (Autosomal Recessive/X-linked inheritance) <sup>3</sup> | 13 <sup>4</sup> |
| Candidate genes (Autosomal Recessive/X-linked inheritance)                     | 1, <i>LTBP3</i> |

<sup>1</sup> Referred to Nimblegen SeqCap V.2 (Roche).

<sup>2</sup> MAF <1% in gnomAD v.2.1 database, and frequency <1% in our *in-house* database.

<sup>3</sup> Filtering retained genes with functionally relevant variants by excluding variants predicted as benign by CADD (scaled score <20) and M-CAP algorithms or benign/likely benign by interVar.

<sup>4</sup> *ATP10B* (c.1381G>T, p.Ala461Ser), *CLMN* (c.472C>G, p.Pro158Ala), *COL12A1* (c.1694G>A, p.Arg565Lys), *EDA* (c.1051G>A, p.Val351Ile), *ERN1* (c.1478\_1486delAGCAGCAGC, p.Gln493\_Gln495del), *KBTBD13* (c.376G>A, p.Ala126Thr), *LTBP3* (c.2894-2A>G), *NSD1* (c.1678G>A, p.Gly560Arg), *PSIP1* (c.1358C>T, p.Ala453Val), *RAB3GAP1* (c.1211A>T, p.Asn404Ile), *SPACA1* (c.437G>A, p.Arg146His), *TPH1* (c.1154A>T, p.Lys385Met), *XBP1* (c.85G>A, p.Gly29Arg).
